# Supplementary material for: Butyrate Protects Pancreatic Beta Cells from Cytokine-Induced Dysfunction
Source: MDPI journal article supplement (doi:10.3390/ijms221910427), 2021-09-27
Supplement: s1 [file s1]

Supplementary Figure 1

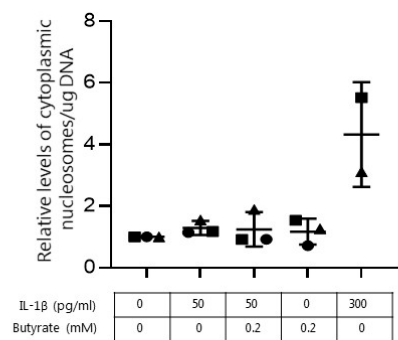

**Supplementary Figure 1: IL-1 $\beta$  and butyrate effects on apoptosis in mouse islets.**  
Apoptosis was measured by analysis of cytoplasmic nucleosome levels in lysates from mouse islets exposed to 50 pg/ml IL-1 $\beta$  and/or 0.2 mM butyrate or left non-exposed for 10 days. Two day stimulation with 300 pg/ml IL-1 $\beta$  served as positive control for induction of apoptosis. Data are shown as means  $\pm$ SD for n=2-3.

Supplementary Figure 2

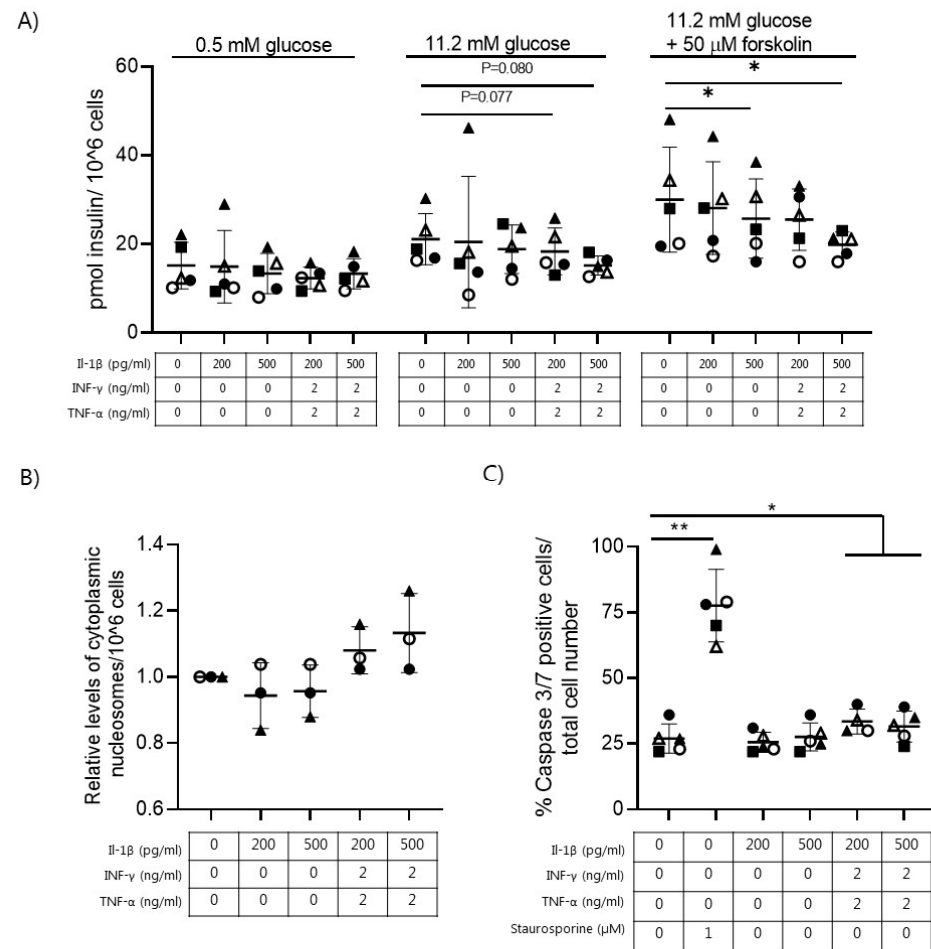

**Supplementary Figure 2: Effect of cytokines on beta cell dysfunction and apoptosis in human EndoC-βH1 cells.**

A) Human EndoC-βH1 cells were cultured for 7 days in the absence or presence of indicated concentrations of IL-1β combined with IFN-γ and TNF-α to determine the combination of cytokines sufficient to induce beta cell dysfunction. Insulin secretion was measured by static batch incubations for 45 min in response to 0.5 mmol/l glucose, 11.2 mmol/l glucose and 11.2 mmol/l glucose + 50 μM forskolin and normalized to cell number. Each condition is tested in quadruplicates. Data are shown as means ± SD for n=5 and analyzed by a 2-sided paired t-test. \*p<0.05 vs control.

Cytokine induced apoptosis in EndoC-βH1 cells exposed to the indicated combinations of cytokines was evaluated by B) cytoplasmic nucleosome level in lysates (n=3) or by C) caspase 3/7 activation (n=5). 1 μM Staurosporine was used as a positive control for induction of apoptosis. Each condition was tested in biological triplicates. Data are normalized to total cell number/well and shown as means ± SD. Data was analyzed by 2-sided paired t-test \*p<0.05, \*\*p<0.01 vs control.

Supplementary Figure 3

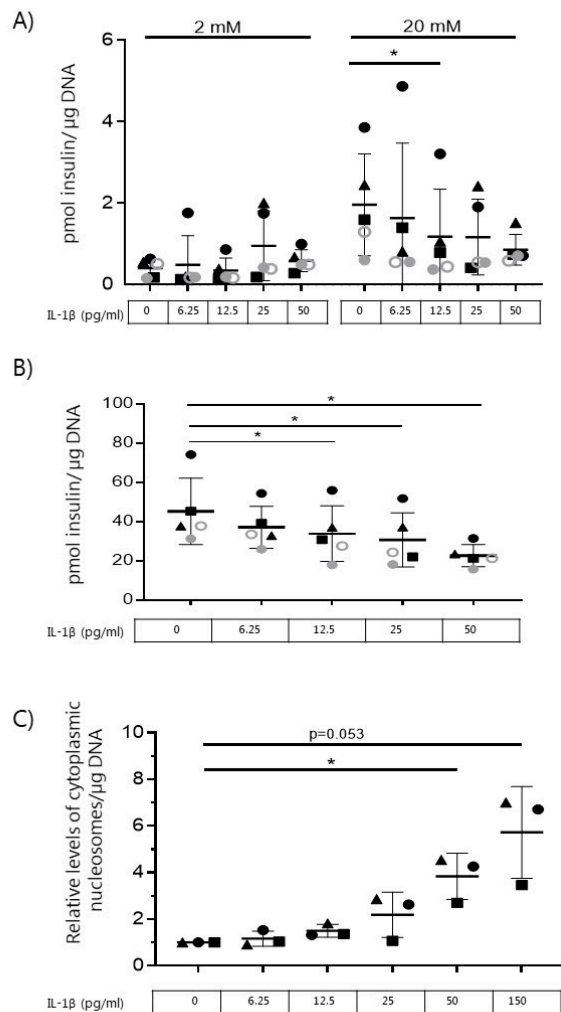

**Supplementary Figure 3: Dose-dependent effect of IL-1β on beta cell dysfunction and apoptosis in rat INS-1E cells.**

INS-1E cells were exposed to increasing concentration of IL-1β (0-50 ng/ml) for 72 hrs. A) Insulin secretion was measured by static batch incubations for 30 min in response to 2 mmol/l glucose followed by 20 mmol/l and normalized to DNA content. B) Total insulin content was measured post-glucose stimulation (n=5). C) Apoptosis was determined in lysates from INS-1E cells after 3 days exposure to increasing concentrations of IL-1β (0-50 ng/ml). As a positive control of apoptosis INS-1E cells were exposed to 150 pg/ml IL-1β for 24h (n=3). Data was normalized to DNA content of cells. Data are shown as means ±SD and analyzed by 2-sided paired student t-test \*p<0.05.

Supplementary Figure 4

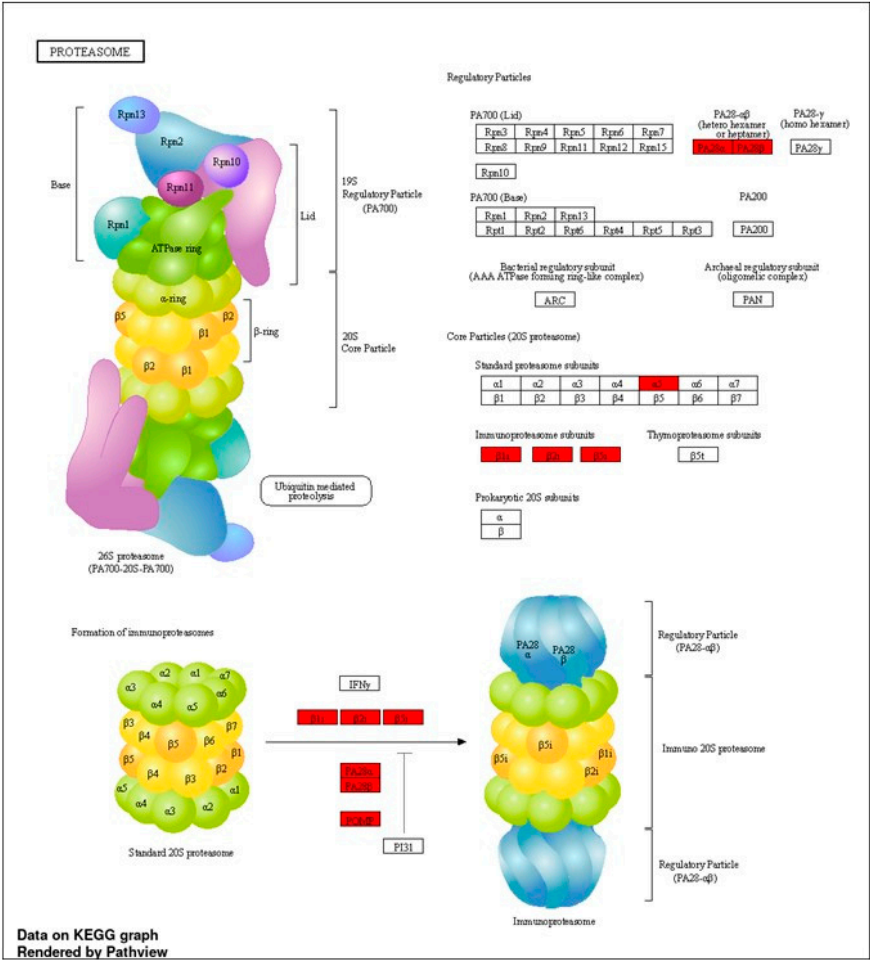

**Supplementary Figure 4: IL-1 $\beta$  regulated genes downregulated by butyrate in the Proteasome KEGG pathway.**  
Overview of the genes in the Proteasome KEGG pathway. The genes downregulated by butyrate are indicated in the red boxes. Pathway map generated by using the ShinyGO v0.61 webtool.

Supplementary Figure 5

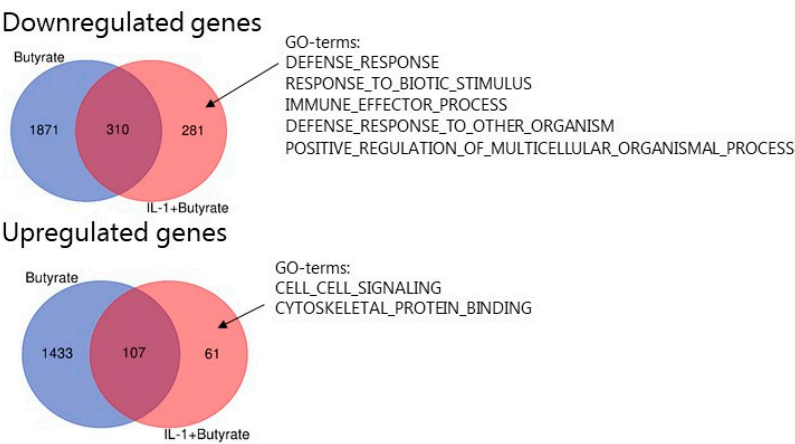

**Supplementary Figure 5: Genes regulated by butyrate in presence and absence of IL-1 $\beta$ .**  
Venn diagram showing the number of genes down- and upregulated by butyrate in presence or absence of IL-1 $\beta$ . Overlapping circles show genes that are both regulated by butyrate alone and in presence of IL-1 $\beta$ . GO-terms significantly regulated by butyrate in the presence of IL-1 $\beta$  are indicated.

Supplementary Figure 6

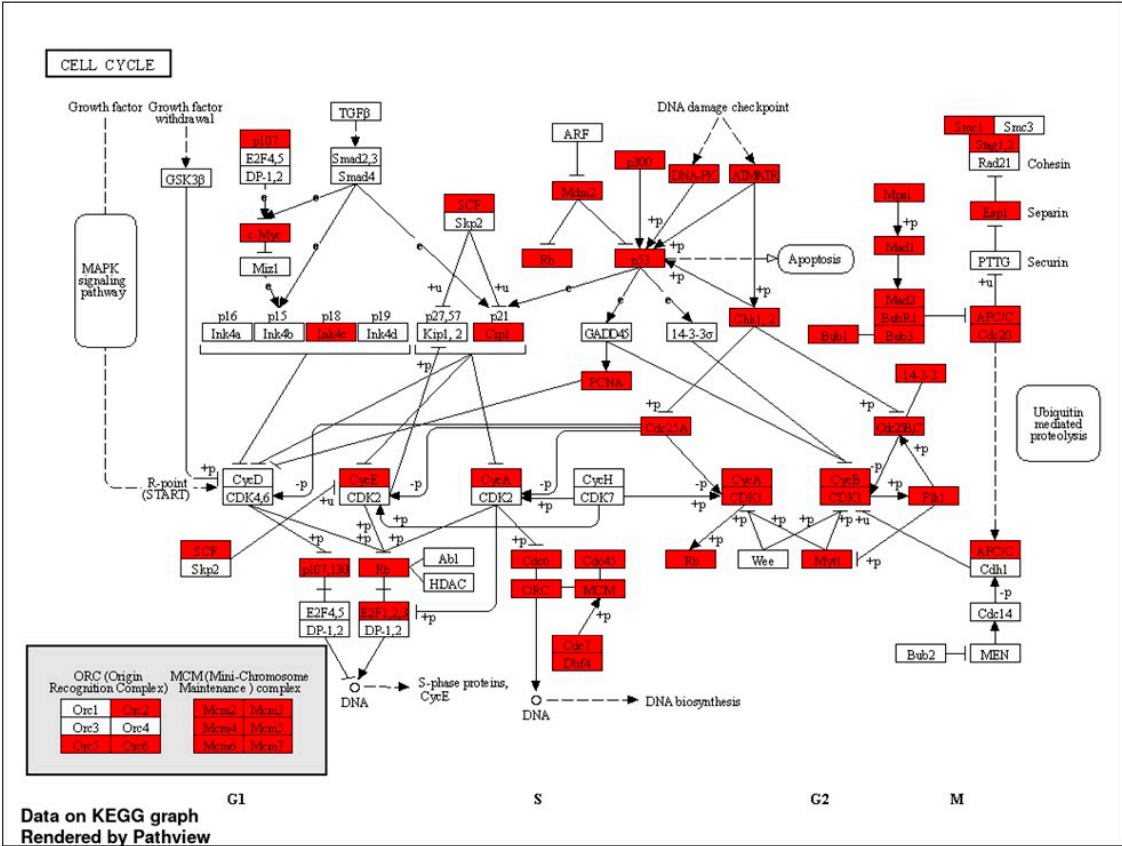

**Supplementary Figure 6: Genes downregulated by butyrate in the cell cycle KEGG pathway.**  
Overview of the genes in the cell cycle KEGG pathway. The genes downregulated by butyrate are indicated in the red boxes. Pathway map generated by using the ShinyGO v0.61 webtool.

KEGG pathway enriched for butyrate downregulated genes

| Functional Category                     | Enrichment FDR | Genes in list | Total genes |
|-----------------------------------------|----------------|---------------|-------------|
| Cell cycle                              | 1.2E-21        | 55            | 123         |
| DNA replication                         | 6.3E-09        | 19            | 35          |
| Metabolic pathways                      | 1.0E-07        | 192           | 1301        |
| Oocyte meiosis                          | 1.2E-07        | 34            | 115         |
| P53 signaling pathway                   | 6.4E-06        | 23            | 71          |
| Human T-cell leukemia virus 1 infection | 1.3E-04        | 46            | 235         |
| Homologous recombination                | 1.3E-04        | 15            | 41          |
| Fanconi anemia pathway                  | 5.3E-04        | 16            | 51          |
| Thyroid hormone signaling pathway       | 1.0E-03        | 26            | 115         |
| Progesterone-mediated oocyte maturation | 1.0E-03        | 22            | 90          |

**Supplementary Table S1: Over-represented gene ontology (GO) terms for IL-1β regulated genes normalized by butyrate**

| <b>GO term</b>                         | <b>Butyrate regulated genes in GO term</b> | <b>Genes in GO term</b> | <b>Adj. p-value</b> |
|----------------------------------------|--------------------------------------------|-------------------------|---------------------|
| <b>Downregulated genes by butyrate</b> |                                            |                         |                     |
| DEFENSE_RESPONSE                       | 111                                        | 1814                    | 3.60E-35            |
| RESPONSE_TO_BIOTIC_STIMULUS            | 99                                         | 1615                    | 3.61E-31            |
| IMMUNE_EFFECTOR_PROCESS                | 85                                         | 1292                    | 1.58E-28            |
| DEFENSE_RESPONSE_TO_OTHER_ORGANISM     | 80                                         | 1203                    | 4.47E-27            |
| INNATE_IMMUNE_RESPONSE                 | 70                                         | 986                     | 4.42E-25            |
| <b>Upregulated genes by butyrate</b>   |                                            |                         |                     |
| TRANSMEMBRANE_TRANSPORT                | 27                                         | 1608                    | 9.08E-07            |
| TRANSPORTER_ACTIVITY                   | 23                                         | 1199                    | 9.08E-07            |
| CELL_CELL_SIGNALING                    | 28                                         | 1809                    | 9.08E-07            |
| ION_TRANSPORT                          | 27                                         | 1696                    | 9.08E-07            |
| SYNAPSE                                | 24                                         | 1357                    | 9.95E-07            |

Downregulated genes:

|                                                                                                                                                                                                                                                                                                                                                                                                                                                                                                                                                                                                                                                                                                                                                                                                       |
|-------------------------------------------------------------------------------------------------------------------------------------------------------------------------------------------------------------------------------------------------------------------------------------------------------------------------------------------------------------------------------------------------------------------------------------------------------------------------------------------------------------------------------------------------------------------------------------------------------------------------------------------------------------------------------------------------------------------------------------------------------------------------------------------------------|
| <b>Defense response</b>                                                                                                                                                                                                                                                                                                                                                                                                                                                                                                                                                                                                                                                                                                                                                                               |
| NOS2, DDX58, FCER1G, RIPK2, TNFAIP3, TRIM5, RELB, SAMHD1, RNF135, APOBEC3F, B2M, SLC11A1, BST2, TYROBP, PSMA5, TREM2, IRF7, PARP9, IFNAR2, HMGB1, SERPING1, DDX60, DTX3L, SERPINB9, STX4, IGHM, C1QC, C1QB, TLR2, TP53, PRDX1, IFIH1, IFI27, CYBB, GSDMD, RNASET2, UNC93B1, ZC3HAV1, IL1B, CXCL10, MOV10, LYZ, IL10RB, APOBEC1, RTP4, TNFRSF1B, PTGER4, PRDX2, CD68, PSME2, NMI, APOE, MUC13, PSME1, PSMB10, PSMB8, PSMB9, IRGM, PARP14, PAK3, ERAP1, CLEC4A, TRAFD1, CCL20, CASP1, CLDN1, ASS1, GBP2, GBP4, ARID5A, NR1H4, CASP4, PLD4, LY86, TYK2, AQP4, GBP6, GBP7, NAIP, MPEG1, STYK1, IL6R, STAB1, LGALS8, TNIP2, PTGS2, CXCR4, CXCL1, APOA2, ITGB2, IL18R1, CST3, IGF1, PLA2G7, ITGB1, GAL, ADCY8, KLF4, ISL1, PLD3, C2CD4A, PTGS1, IL17RE, BDNF, ADCY1, BMPR1B, BACE2, SCN9A, LXN, LIPA, PARP4 |
| <b>Response to biotic stimuli</b>                                                                                                                                                                                                                                                                                                                                                                                                                                                                                                                                                                                                                                                                                                                                                                     |
| NOS2, DDX58, FCER1G, RIPK2, TNFAIP3, TRIM5, RELB, SAMHD1, RNF135, APOBEC3F, B2M, SLC11A1, BST2, TYROBP, PSMA5, TREM2, IRF7, PARP9, IFNAR2, HMGB1, SERPING1, DDX60, DTX3L, SERPINB9, STX4, IGHM, C1QC, C1QB, TLR2, TP53, PRDX1, IFIH1, IFI27, CYBB, GSDMD, RNASET2, UNC93B1, ZC3HAV1, IL1B, CXCL10, MOV10, LYZ, IL10RB, APOBEC1, RTP4, TNFRSF1B, PTGER4, PRDX2, CD68, PSME2, NMI, APOE, MUC13, PSME1, PSMB10, PSMB8, PSMB9, IRGM, PARP14, PAK3, ERAP1, CLEC4A, TRAFD1, CCL20, CASP1, CLDN1, ASS1, GBP2, GBP4, ARID5A, NR1H4, CASP4, PLD4, LY86, TYK2, AQP4, GBP6, GBP7, NAIP, MPEG1, STYK1, IL6R, STAB1, LGALS8, TNIP2, PTGS2, CXCR4, CXCL1, CASP3, HPGD, GGT7, ABCC2, NFKB2, NFKBIB, PIM2, IVNS1ABP, PLAAT3, HERC6, BTBD17                                                                            |
| <b>Immune effector process</b>                                                                                                                                                                                                                                                                                                                                                                                                                                                                                                                                                                                                                                                                                                                                                                        |
| NOS2, DDX58, FCER1G, RIPK2, TNFAIP3, TRIM5, RELB, SAMHD1, RNF135, APOBEC3F, B2M, SLC11A1, BST2, TYROBP, PSMA5, TREM2, IRF7, PARP9, IFNAR2, HMGB1, SERPING1, DDX60, DTX3L, SERPINB9, STX4, IGHM, C1QC, C1QB, TLR2, TP53, PRDX1, IFIH1, IFI27, CYBB, GSDMD, RNASET2, UNC93B1, ZC3HAV1, IL1B, CXCL10, MOV10, LYZ, IL10RB, APOBEC1, RTP4, TNFRSF1B, PTGER4, PRDX2, CD68, APOA2, ITGB2, IL18R1, CST3, ACTB, CPB2, GPI, INPP5D, CYFIP1, CD33, ARPC5, FCGR2A, JAG1, CPN1, ARPC3, CR1L, FABP5, CAT, CD53, GUSB, GALNS, RORC, NCSTN, CTSS, ARHGAP45, AGA, FUCA1, DERA, PRDX4, STBD1, METTL7A, CSTB, VCL, CPPED1, CRISPLD2, WDR1                                                                                                                                                                                |
| <b>Defense response to other organisms</b>                                                                                                                                                                                                                                                                                                                                                                                                                                                                                                                                                                                                                                                                                                                                                            |
| NOS2, DDX58, FCER1G, RIPK2, TNFAIP3, TRIM5, RELB, SAMHD1, RNF135, APOBEC3F, B2M, SLC11A1, BST2, TYROBP, PSMA5, TREM2, IRF7, PARP9, IFNAR2, HMGB1, SERPING1, DDX60, DTX3L, SERPINB9, STX4, IGHM, C1QC, C1QB, TLR2, TP53, PRDX1, IFIH1, IFI27, CYBB, GSDMD, RNASET2, UNC93B1, ZC3HAV1, IL1B, CXCL10, MOV10, LYZ, IL10RB, APOBEC1, RTP4, PSME2, NMI, APOE, MUC13, PSME1, PSMB10, PSMB8, PSMB9, IRGM, PARP14, PAK3, ERAP1, CLEC4A, TRAFD1, CCL20, CASP1, CLDN1, ASS1, GBP2, GBP4, ARID5A, NR1H4, CASP4, PLD4, LY86, TYK2, AQP4, GBP6, GBP7, NAIP, MPEG1, STYK1, IL6R, STAB1, LGALS8                                                                                                                                                                                                                       |
| <b>Innate immune response</b>                                                                                                                                                                                                                                                                                                                                                                                                                                                                                                                                                                                                                                                                                                                                                                         |
| NOS2, DDX58, FCER1G, RIPK2, TNFAIP3, TRIM5, RELB, SAMHD1, RNF135, APOBEC3F, B2M, SLC11A1, BST2, TYROBP, PSMA5, TREM2, IRF7, PARP9, IFNAR2, HMGB1, SERPING1, DDX60, DTX3L, SERPINB9, STX4, IGHM, C1QC, C1QB, TLR2, TP53, PRDX1, IFIH1, IFI27, CYBB, GSDMD, RNASET2, UNC93B1, ZC3HAV1, PSME2, NMI, APOE, MUC13, PSME1, PSMB10, PSMB8, PSMB9, IRGM, PARP14, PAK3, ERAP1, CLEC4A, TRAFD1, CCL20, CASP1, CLDN1, ASS1, GBP2, GBP4, ARID5A, NR1H4, CASP4, PLD4, LY86, TYK2, AQP4, GBP6, GBP7, NAIP, MPEG1, STYK1                                                                                                                                                                                                                                                                                             |

Upregulated genes:

|                                                                                                                                                                                                                          |
|--------------------------------------------------------------------------------------------------------------------------------------------------------------------------------------------------------------------------|
| <b>Transmembrane Transport</b>                                                                                                                                                                                           |
| VDAC1, SLC30A1, KCNK3, KCNQ2, ITPR1, SV2A, KCNJ11, SLC7A11, ATP2B1, ATP1B2, MAGT1, SLC3A2, SLC7A5, KCNH2, SLC25A23, KCNF1, COX6A2, SLC22A17, SLC35A2, SLCO1A2, SLC17A9, SLC35F1, SHANK1, RASGRF1, DDIT3, PPARGC1A, PRKCI |
| <b>Transporter activity</b>                                                                                                                                                                                              |
| VDAC1, SLC30A1, KCNK3, KCNQ2, ITPR1, SV2A, KCNJ11, SLC7A11, ATP2B1, ATP1B2, MAGT1, SLC3A2, SLC7A5, KCNH2, SLC25A23, KCNF1, COX6A2, SLC22A17, SLC35A2, SLCO1A2, SLC17A9, SLC35F1, TNPO1                                   |
| <b>Cell cell signaling</b>                                                                                                                                                                                               |
| VDAC1, SLC30A1, KCNK3, KCNQ2, ITPR1, SV2A, KCNJ11, SLC7A11, SHANK1, RASGRF1, DDIT3, PKX, BAIAP3ZDHHC2, RIMS3, AGRN, NTF4, ETV5, DLGAP3, CUX2, ADGRG1, HADH, ACVR1C, C1QTNF4, RASL10B, NDRG2, ADGRA2, CCDC88C             |
| <b>Ion transport</b>                                                                                                                                                                                                     |
| VDAC1, SLC30A1, KCNK3, KCNQ2, ITPR1, SV2A, KCNJ11, SLC7A11, ATP2B1, ATP1B2, MAGT1, SLC3A2, SLC7A5, KCNH2, SLC25A23, KCNF1, COX6A2, SLC22A17, SLC35A2, SLCO1A2, SHANK1, RASGRF1, DDIT3, PPARGC1A, PKX, MT3, EPB41         |
| <b>Synapse</b>                                                                                                                                                                                                           |
| VDAC1, SLC30A1, KCNK3, KCNQ2, ITPR1, SV2A, ATP2B1, ATP1B2, SHANK1, PRKCI, BAIAP3, ZDHHC2, RIMS3, AGRN, NTF4, ETV5, DLGAP3, MT3, EPB41, SEC22B, STX16, BCL11A, CPEB1, LAMA5                                               |



**Supplementary Table S2: Over-represented gene ontology (GO) terms for butyrate regulated genes**

| GO term                                | Butyrate regulated genes in GO term | Genes in GO term | Adj. p-value |
|----------------------------------------|-------------------------------------|------------------|--------------|
| <b>Downregulated genes by butyrate</b> |                                     |                  |              |
| GO_CELL_CYCLE                          | 401                                 | 1881             | 1.79E-142    |
| GO_CELL_CYCLE_PROCESS                  | 336                                 | 1422             | 1.18E-131    |
| GO_MITOTIC_CELL_CYCLE                  | 285                                 | 1053             | 8.79E-127    |
| GO_CHROMOSOME_ORGANIZATION             | 276                                 | 1253             | 7.01E-99     |
| GO_REGULATION_OF_CELL_CYCLE            | 250                                 | 1226             | 2.07E-81     |
| <b>Upregulated genes by butyrate</b>   |                                     |                  |              |
| GO_CELL_PROJECTION_ORGANIZATION        | 199                                 | 1588             | 3.89E-51     |
| GO_WHOLE_MEMBRANE                      | 205                                 | 1721             | 1.55E-49     |
| GO_SYNAPSE                             | 179                                 | 1357             | 3.51E-49     |
| GO_NEUROGENESIS                        | 197                                 | 1674             | 7.15E-47     |
| GO_REGULATION_OF_TRANSPORT             | 202                                 | 1588             | 5.60E-43     |

**Downregulated genes:**

|                                                                                                                                                                                                                                                                                                                                                                                                                                                                                                                                                                                                                                                                                                                                                                                                                                                                                                                                                                                                                                                                                                                                                                                                                                                                                                                                                                                                                                                                                                                                                                                                                                                                                                                                                                                                                                                                                                                                                                                                                                                                                                                                                                                                                                                                                                                                                                                                                                                                                                                                                                                                                                                                                                                                                                                                                                                                                      |
|--------------------------------------------------------------------------------------------------------------------------------------------------------------------------------------------------------------------------------------------------------------------------------------------------------------------------------------------------------------------------------------------------------------------------------------------------------------------------------------------------------------------------------------------------------------------------------------------------------------------------------------------------------------------------------------------------------------------------------------------------------------------------------------------------------------------------------------------------------------------------------------------------------------------------------------------------------------------------------------------------------------------------------------------------------------------------------------------------------------------------------------------------------------------------------------------------------------------------------------------------------------------------------------------------------------------------------------------------------------------------------------------------------------------------------------------------------------------------------------------------------------------------------------------------------------------------------------------------------------------------------------------------------------------------------------------------------------------------------------------------------------------------------------------------------------------------------------------------------------------------------------------------------------------------------------------------------------------------------------------------------------------------------------------------------------------------------------------------------------------------------------------------------------------------------------------------------------------------------------------------------------------------------------------------------------------------------------------------------------------------------------------------------------------------------------------------------------------------------------------------------------------------------------------------------------------------------------------------------------------------------------------------------------------------------------------------------------------------------------------------------------------------------------------------------------------------------------------------------------------------------------|
| <b>Cell cycle</b>                                                                                                                                                                                                                                                                                                                                                                                                                                                                                                                                                                                                                                                                                                                                                                                                                                                                                                                                                                                                                                                                                                                                                                                                                                                                                                                                                                                                                                                                                                                                                                                                                                                                                                                                                                                                                                                                                                                                                                                                                                                                                                                                                                                                                                                                                                                                                                                                                                                                                                                                                                                                                                                                                                                                                                                                                                                                    |
| CDK1, CDC6, AURKB, NEK2, CENPF, PCNA, TP53, BRCA1, CHEK1, ATM, GEN1, CDC45, CCNE1, CCNE2, CCNB1, BUB1B, CDC20, RB1, FBXO5, PLK1, AURKA, CENPE, NDC80, SPD1L, MAD1L1, MAD2L1, KIF14, ESPL1, TACC3, JADE1, TTK, DDX3X, CDK5RAP2, DLGAP5, BLM, CDCA5, CDT1, EP300, PSME4, CUL4B, RPA2, NBN, RFW3, HUS1, PRKDC, DUSP1, MYC, UBE2C, CDC23, BUB1, BUB3, RBL1, SIN3A, PCID2, BRD7, CCNA2, BRCA2, RAD51, TOP2A, NEK7, INCENP, NUMA1, PSRC1, NUSAP1, KNSTRN, SPAG5, KIF23, RACGAP1, PRC1, MCPH1, PPP1R10, DNA2, FANCD2, IL1B, NAA10, MKI67, USP16, ZWINT, MCM3, MCM2, POLA1, POLE, POLE4, POLA2, MCM6, MCM7, MCM5, MCM4, MCM8, PPM1D, NASP, PHF8, SMC1A, KIF22, KIF2C, SGO1, STAG2, STAG1, DSN1, CDCA8, KIFC1, KIF18B, KIF4A, KATNB1, KIF18A, HASPIN, RTE1, DSCC1, NUF2, CENPW, CENPA, CENPC, NSL1, NCAPD3, NCAPD2, NCAPG, SMC4, SMC2, NCAPG2, NCAPH, CENPH, CENPK, CDC7, STOX1, DTL, TOPBP1, CCNF, PLK2, KNTC1, PLK4, CENPJ, HAUS4, CDC25B, TUBB, CDK2AP2, TPX2, DYNLL1, BRSK1, E2F1, GTSE1, CEP57, CEP70, CEP43, OFD1, CEP192, CEP135, CEP76, PCNT, CEP152, HMMR, CEP78, TUBB4B, APP, CCNB2, MASTL, TIPIN, RBBP8, ATAD5, PSMD14, CDKN1A, SLFN11, CLSPN, TAOK3, FOXM1, KLF4, E2F7, E2F8, ANLN, CDC25A, RRM2, PSMC3, PSME2, PSMF1, PSMA7, PSMD11, CUL1, FBXO7, PSME1, PSMA4, PSMD6, PSMB8, PSMD8, E2F6, MDM2, TRIM39, RPS27L, PIDD1, RNASEH2B, CNOT8, DBF4, PKMYT1, PLCB1, APPL1, DACT1, AVEN, CDKN2C, ECD, CKS2, CKS1B, CDK14, CCNG1, CCNG2, FBXL3, FBXL12, CCNI, GMNN, PIM2, EIF4EBP1, CUL7, KIF20B, KIF11, CCSAP, KIF20A, ECT2, CEP85, STIL, POC1A, DLG1, EME2, MDC1, INTS3, FBXW5, EGF, DRG1, CAV2, ZWILCH, MAP3K20, DDIAS, HRAS, ORC2, ORC6, MCM10, ORC5, TYMS, UBE2S, FBXL15, TAF2, MELK, GSPT1, PPAT, BCAT1, IQGAP3, DHFRP1, ID4, ZNF324, XRCC2, BIRC5, CKAP2, CEP55, JTB, STMN1, MAP4, XIAP, AAAS, TUBGCP3, TUBGCP2, TUBGCP5, WDR62, TBCE, EML1, LIG1, VCP, SPC25, SAPCD2, SNX9, RASA1, STAMBP, ANKLE2, PTPA, MYBL1, BRCC3, NPM1, PAXIP1, TAF1, DDX11, KAT2B, USP51, BRIP1, TRIM37, EPC1, CENPX, SLX4, POLD1, ESCO2, FANCM, MSH3, RFC2, RFC3, RAD54B, SMARCA1, KNL1, CENPQ, TIMELESS, NEK10, DDRGK1, PCLAF, CALM2, KLHL21, NUBP1, CEP295, CEP120, ASPM, NSUN2, MAP2K1, GAS2, NUDT16, DACH1, BARB1, FIGNL1, SSTR5, CBX5, PPP2R5B, XPO1, GATA6, MLXIP, NOTCH1, CDC123, PPP2R3B, TBRG1, RRAGB, IRF1, TP53INP1, CAB39L, INHA, WDR6, PRR11, HEPACAM2, NIN, C2CD3, SSX2IP, CNTLN, SASS6, FANCA, PSMC3IP, PHGDH, SIRT1, YEATS4, DUSP3, NUP214, SKA3, SKA1, TUBA1B, CLIP1, KIF15, TBCD, TUBB6, WDHD1, RRM1, PBK, H2AX, FBXO4, ATR, COP55, ACTB, HCFC1, HELLS, MIS18A, SMARCB1, CHAF1A, CHAF1B, EXO1, UHRF1, CHTF18, ERCC6L, OIP5, MIS18BP1, SUV39H1, HJURP, SUV39H2, EID1, ZMYND11, PRKACB, THOC1, LIN9, TRIM21, CRY1, JUN, BIRC2, NR4A1, E2F2, CCNDBP1, LIN54, TRIOBP, POC5, FANCI, PPP1CA, ANAPC13, SPC24, CDCA2, USP39, SENP5, CDCA3, PIMREG, MAPK4, GAK, GSPT2, MNS1, SIAH1, MRPL41, RGS2 |
| <b>Cell cycle process</b>                                                                                                                                                                                                                                                                                                                                                                                                                                                                                                                                                                                                                                                                                                                                                                                                                                                                                                                                                                                                                                                                                                                                                                                                                                                                                                                                                                                                                                                                                                                                                                                                                                                                                                                                                                                                                                                                                                                                                                                                                                                                                                                                                                                                                                                                                                                                                                                                                                                                                                                                                                                                                                                                                                                                                                                                                                                            |
| CDK1, CDC6, AURKB, NEK2, CENPF, PCNA, TP53, BRCA1, CHEK1, ATM, GEN1, CDC45, CCNE1, CCNE2, CCNB1, BUB1B, CDC20, RB1, FBXO5, PLK1, AURKA, CENPE, NDC80, SPD1L, MAD1L1, MAD2L1, KIF14, ESPL1, TACC3, JADE1, TTK, DDX3X, CDK5RAP2, DLGAP5, BLM, CDCA5, CDT1, EP300, PSME4, CUL4B, RPA2, NBN, RFW3, HUS1, PRKDC, DUSP1, MYC, UBE2C, CDC23, BUB1, BUB3, RBL1, SIN3A, PCID2, BRD7, CCNA2, BRCA2, RAD51, TOP2A, NEK7, INCENP, NUMA1, PSRC1, NUSAP1, KNSTRN, SPAG5, KIF23, RACGAP1, PRC1, MCPH1, PPP1R10, DNA2, FANCD2, IL1B, NAA10, MKI67, USP16, ZWINT, MCM3, MCM2, POLA1, POLE, POLE4, POLA2, MCM6, MCM7, MCM5, MCM4, MCM8, PPM1D, NASP, PHF8, SMC1A, KIF22, KIF2C, SGO1, STAG2, STAG1, DSN1, CDCA8, KIFC1, KIF18B, KIF4A, KATNB1, KIF18A, HASPIN, RTE1, DSCC1, NUF2, CENPW, CENPA, CENPC, NSL1, NCAPD3, NCAPD2, NCAPG, SMC4, SMC2, NCAPG2, NCAPH, CENPH, CENPK, CDC7, STOX1, DTL, TOPBP1, CCNF, PLK2, KNTC1, PLK4, CENPJ, HAUS4, CDC25B, TUBB, CDK2AP2, TPX2, DYNLL1, BRSK1, E2F1, GTSE1, CEP57, CEP70, CEP43, OFD1, CEP192, CEP135, CEP76, PCNT, CEP152, HMMR, CEP78, TUBB4B, APP, CCNB2, MASTL, TIPIN, RBBP8, ATAD5, PSMD14, CDKN1A, SLFN11, CLSPN, TAOK3, FOXM1, KLF4, E2F7, E2F8, ANLN, CDC25A, RRM2, PSMC3, PSME2, PSMF1, PSMA7, PSMD11, CUL1, FBXO7, PSME1, PSMA4,                                                                                                                                                                                                                                                                                                                                                                                                                                                                                                                                                                                                                                                                                                                                                                                                                                                                                                                                                                                                                                                                                                                                                                                                                                                                                                                                                                                                                                                                                                                                                                                                                  |

|                                                                                                                                                                                                                                                                                                                                                                                                                                                                                                                                                                                                                                                                                                                                                                                                                                                                                                                                                                                                                                                                                                                                                                                                                                                                                                                                                                                                                                                                                                                                                                                                                                                                                                                                                                                                                                                                                                                                                                                                                                                                   |
|-------------------------------------------------------------------------------------------------------------------------------------------------------------------------------------------------------------------------------------------------------------------------------------------------------------------------------------------------------------------------------------------------------------------------------------------------------------------------------------------------------------------------------------------------------------------------------------------------------------------------------------------------------------------------------------------------------------------------------------------------------------------------------------------------------------------------------------------------------------------------------------------------------------------------------------------------------------------------------------------------------------------------------------------------------------------------------------------------------------------------------------------------------------------------------------------------------------------------------------------------------------------------------------------------------------------------------------------------------------------------------------------------------------------------------------------------------------------------------------------------------------------------------------------------------------------------------------------------------------------------------------------------------------------------------------------------------------------------------------------------------------------------------------------------------------------------------------------------------------------------------------------------------------------------------------------------------------------------------------------------------------------------------------------------------------------|
| <p>PSMD6, PSMB8, PSMB10, PSMD8, E2F6, MDM2, TRIM39, RPS27L, PIDD1, RNASEH2B, CNOT8, DBF4, PKMYT1, PLCB1, APPL1, DACT1, AVEN, CDKN2C, ECD, CKS2, CKS1B, CDK14, CCNG1, CCNG2, FBXL3, FBXL12, CCNI, GMNN, PIM2, EIF4EBP1, CUL7, KIF20B, KIF11, CCSAP, KIF20A, ECT2, CEP85, STIL, POC1A, DLG1, EME2, MDC1, INTS3, FBXW5, EGF, DRG1, CAV2, ZWILCH, MAP3K20, DDIAS, HRAS, ORC2, ORC6, MCM10, ORC5, TYMS, UBE2S, FBXL15, TAF2, MELK, GSPT1, PPAT, BCAT1, IQGAP3, DHFRP1, ID4, ZNF324, XRCC2, BIRC5, CKAP2, CEP55, JTB, STMN1, MAP4, XIAP, AAAS, TUBGCP3, TUBGCP2, TUBGCP5, WDR62, TBCE, EML1, LIG1, VCP, SPC25, SAPCD2, SNX9, RASA1, STAMBP, ANKLE2, PTPA, MYBL1, BRCC3, NPM1, PAXIP1, TAF1, DDX11, KAT2B, USP51, BRIP1, TRIM37, EPC1, CENPX, SLX4, POLD1, ESCO2, FANCM, MSH3, RFC2, RFC3, RAD54B, SMARCAD1, KNL1, CENPQ, TIMELESS, NEK10, DDRGK1, PCLAF, CALM2, KLHL21, NUBP1, CEP295, CEP120, ASPM, NSUN2, MAP2K1, GAS2, NUDT16, DACH1, BARD1, FIGNL1, SSTR5, CBX5, PPP2R5B, XPO1, GATA6, MLXIPL, NOTCH1, CDC123, PPP2R3B, TBRG1, RRAGB, IRF1, TP53INP1, CAB39L, INHA, WDR6, PRR11, HEPACAM2, NIN, C2CD3, SSX2IP, CNTLN, SASS6, FANCA, PSMC3IP, PHGDH</p>                                                                                                                                                                                                                                                                                                                                                                                                                                                                                                                                                                                                                                                                                                                                                                                                                                                                                                              |
| <p><b>Mitotic cell cycle</b></p> <p>CDK1, CDC6, AURKB, NEK2, CENPF, PCNA, TP53, BRCA1, CHEK1, ATM, GEN1, CDC45, CCNE1, CCNE2, CCNB1, BUB1B, CDC20, RB1, FBXO5, PLK1, AURKA, CENPE, NDC80, SPDL1, MAD1L1, MAD2L1, KIF14, ESPL1, TACC3, JADE1, TTK, DDX3X, CDK5RAP2, DLGAP5, BLM, CDCA5, CDT1, EP300, PSME4, CUL4B, RPA2, NBN, RFW3, HUS1, PRKDC, DUSP1, MYC, UBE2C, CDC23, BUB1, BUB3, RBL1, SIN3A, PCID2, BRD7, CCNA2, BRCA2, RAD51, TOP2A, NEK7, INCENP, NUMA1, PSRC1, NUSAP1, KNSTRN, SPAG5, KIF23, RACGAP1, PRC1, MCPH1, PPP1R10, DNA2, FANCD2, IL1B, NAA10, MKI67, USP16, ZWINT, MCM3, MCM2, POLA1, POLE, POLE4, POLA2, MCM6, MCM7, MCM5, MCM4, MCM8, PPM1D, NASP, PHF8, SMC1A, KIF22, KIF2C, SGO1, STAG2, STAG1, DSN1, CDCA8, KIFC1, KIF18B, KIF4A, KATNB1, KIF18A, HASPIN, RTE1, DSCC1, NUF2, CENPW, CENPA, CENPC, NSL1, NCAPD3, NCAPD2, NCAPG, SMC4, SMC2, NCAPG2, NCAPH, CENPH, CENPK, CDC7, STOX1, DTL, TOPBP1, CCNF, PLK2, KNTC1, PLK4, CENPJ, HAUS4, CDC25B, TUBB, CDK2AP2, TPX2, DYNLL1, BRSK1, E2F1, GTSE1, CEP57, CEP70, CEP43, OFD1, CEP192, CEP135, CEP76, PCNT, CEP152, HMMR, CEP78, TUBB4B, APP, CCNB2, MASTL, TIPIN, RBBP8, ATAD5, PSMD14, CDKN1A, SLFN11, CLSPN, TAOK3, FOXM1, KLF4, E2F7, E2F8, ANLN, CDC25A, RRM2, PSMC3, PSME2, PSMF1, PSMA7, PSMD11, CUL1, FBXO7, PSME1, PSMA4, PSMD6, PSMB8, PSMB10, PSMD8, E2F6, MDM2, TRIM39, RPS27L, PIDD1, RNASEH2B, CNOT8, DBF4, PKMYT1, PLCB1, APPL1, DACT1, AVEN, CDKN2C, ECD, CKS2, CKS1B, CDK14, CCNG1, CCNG2, FBXL3, FBXL12, CCNI, GMNN, PIM2, EIF4EBP1, CUL7, KIF20B, KIF11, CCSAP, KIF20A, ECT2, CEP85, STIL, POC1A, DLG1, EME2, MDC1, INTS3, FBXW5, EGF, DRG1, CAV2, ZWILCH, MAP3K20, DDIAS, HRAS, ORC2, ORC6, MCM10, ORC5, TYMS, UBE2S, FBXL15, TAF2, MELK, GSPT1, PPAT, BCAT1, IQGAP3, DHFRP1, ID4, ZNF324, XRCC2, BIRC5, CKAP2, CEP55, JTB, STMN1, MAP4, XIAP, AAAS, TUBGCP3, TUBGCP2, TUBGCP5, WDR62, TBCE, EML1, LIG1, VCP, SPC25, SAPCD2, SNX9, RASA1, STAMBP, ANKLE2, PTPA, MYBL1, SIRT1, YEATS4, DUSP3, NUP214, SKA3, SKA1, TUBA1B, CLIP1, KIF15, TBCD, TUBB6, WDHD1, RRM1, PBK</p> |
| <p><b>Chromosome organization</b></p> <p>CDK1, CDC6, AURKB, NEK2, CENPF, PCNA, TP53, BRCA1, CHEK1, ATM, GEN1, CDC45, CCNE1, CCNE2, CCNB1, BUB1B, CDC20, RB1, FBXO5, PLK1, AURKA, CENPE, NDC80, SPDL1, MAD1L1, MAD2L1, KIF14, ESPL1, TACC3, JADE1, TTK, DDX3X, CDK5RAP2, DLGAP5, BLM, CDCA5, CDT1, EP300, PSME4, CUL4B, RPA2, NBN, RFW3, HUS1, PRKDC, DUSP1, MYC, UBE2C, CDC23, BUB1, BUB3, RBL1, SIN3A, PCID2, BRD7, CCNA2, BRCA2, RAD51, TOP2A, NEK7, INCENP, NUMA1, PSRC1, NUSAP1, KNSTRN, SPAG5, KIF23, RACGAP1, PRC1, MCPH1, PPP1R10, DNA2, FANCD2, IL1B, NAA10, MKI67, USP16, ZWINT, MCM3, MCM2, POLA1, POLE, POLE4, POLA2, MCM6, MCM7, MCM5, MCM4, MCM8, PPM1D, NASP, PHF8, SMC1A, KIF22, KIF2C, SGO1, STAG2, STAG1, DSN1, CDCA8, KIFC1, KIF18B, KIF4A, KATNB1, KIF18A, HASPIN, RTE1, DSCC1, NUF2, CENPW, CENPA, CENPC, NSL1, NCAPD3, NCAPD2, NCAPG, SMC4, SMC2, NCAPG2, NCAPH, CENPH, CENPK, BRCC3, NPM1, PAXIP1, TAF1, DDX11, KAT2B, USP51, BRIP1, TRIM37, EPC1, CENPX, SLX4, POLD1, ESCO2, FANCM, MSH3, RFC2, RFC3, RAD54B, SMARCAD1, KNL1, CENPQ, SIRT1, YEATS4, H2AX, FBXO4, ATR, COPS5, ACTB, HCF1, HELLS, MIS18A, SMARCB1, CHAF1A, CHAF1B, EXO1, UHRF1, CHTF18, ERCC6L, OIP5, MIS18BP1, SUV39H1, HJURP, SUV39H2, EID1, ZMYND11, RAD18, TCP1, CCT4, CCT5, CCT3, MAP1S, PHF1, LEO1, HDAC6, ATXN7, KAT5, SMC6, RNF168, ACTR5, MCRS1, ACTL6A, INO80C, EPC2, NHP2, SMARCA1, N6AMT1, DKC1, EXOSC10, MBD3, NOP10, IGHMBP2, POLQ, MCM9, GINS4, GINS2, SETX, XRCC6, XRCC1, KMT5B, EMSY, HMGB1, HMGB2, PARP10, DTX3L, HMGN1, EYA1, DEK, KDM2A, DNMT1, TIN2, H1-10, APOBEC1, PARN, XRN1, KDM1B, TOX, NAP1L2, ASH2L, ING5, BRPF3, DPY30, MEAF6, ZNHIT1, SMARCC1, CREBBP, GTF2B, KAT6B, SMARCC2, OGT, KDM3A, JADE2, BRD8, CXXC1, BRMS1, ING3, KDM5D, KDM4A, MSL3, SIN3B, BRD9, SMYD2, CDAN1, CENPN, CENPM, CENPI, CENPP, MACROH2A2, HAT1, JAK2, CAMK2D, PINK1, ATAD2, PKN1, GPX4, THAP7, ISL1, MCM3AP, H2BC5, NAP1L3, ASF1B, UBN1, TCF7L1, PPM1F, NELFE, GLYR1, NUP155, FAM172A, NR1H4, H2AZ1, FOXA3, CDCA4, ELOF1, HIRIP3</p>                                    |
| <p><b>Regulation of cell cycle</b></p> <p>CDK1, CDC6, AURKB, NEK2, CENPF, PCNA, TP53, BRCA1, CHEK1, ATM, GEN1, CDC45, CCNE1, CCNE2, CCNB1, BUB1B, CDC20, RB1, FBXO5, PLK1, AURKA, CENPE, NDC80, SPDL1, MAD1L1, MAD2L1, KIF14, ESPL1, TACC3, JADE1, TTK, DDX3X, CDK5RAP2, DLGAP5, BLM, CDCA5, CDT1, EP300, PSME4, CUL4B, RPA2, NBN, RFW3, HUS1, PRKDC, DUSP1, MYC, UBE2C, CDC23, BUB1, BUB3, RBL1, SIN3A, PCID2, BRD7, CCNA2, BRCA2, RAD51, TOP2A, NEK7, INCENP, NUMA1, PSRC1, NUSAP1, KNSTRN, SPAG5, KIF23, RACGAP1, PRC1, MCPH1, PPP1R10, DNA2, FANCD2, IL1B, NAA10, MKI67, USP16, ZWINT, CDC7, STOX1, DTL, TOPBP1, CCNF, PLK2, KNTC1, PLK4, CENPJ, HAUS4, CDC25B, TUBB, CDK2AP2, TPX2, DYNLL1, BRSK1, E2F1, GTSE1, CEP57, CEP70, CEP43, OFD1, CEP192, CEP135, CEP76, PCNT, CEP152, HMMR, CEP78, TUBB4B, APP, CCNB2, MASTL, TIPIN, RBBP8, ATAD5, PSMD14, CDKN1A, SLFN11, CLSPN, TAOK3, FOXM1, KLF4, E2F7, E2F8, ANLN, CDC25A, RRM2, PSMC3, PSME2, PSMF1, PSMA7, PSMD11, CUL1, FBXO7, PSME1, PSMA4, PSMD6, PSMB8, PSMB10, PSMD8, E2F6, MDM2, TRIM39, RPS27L, PIDD1, RNASEH2B, CNOT8, DBF4, PKMYT1, PLCB1, APPL1, DACT1, AVEN, CDKN2C, ECD, CKS2, CKS1B, CDK14, CCNG1, CCNG2, FBXL3, FBXL12, CCNI, GMNN, PIM2, EIF4EBP1, CUL7, KIF20B, KIF11, CCSAP, KIF20A, ECT2, CEP85, STIL, POC1A, DLG1, EME2, MDC1, INTS3, FBXW5, EGF, DRG1, CAV2, ZWILCH, MAP3K20, DDIAS, HRAS, BRCC3, NPM1, PAXIP1, TAF1, DDX11, KAT2B, USP51, BRIP1, TRIM37, EPC1, TIMELESS, NEK10, DDRGK1, PCLAF, CALM2, KLHL21, NUBP1, CEP295, CEP120, ASPM, NSUN2, MAP2K1, GAS2, NUDT16, DACH1, BARD1, FIGNL1, SSTR5, CBX5, PPP2R5B, XPO1, GATA6, MLXIPL, NOTCH1, CDC123, PPP2R3B, TBRG1, RRAGB, IRF1, TP53INP1,</p>                                                                                                                                                                                                                                                                                                                                                                                    |

|                                                                                                                                                                   |
|-------------------------------------------------------------------------------------------------------------------------------------------------------------------|
| CAB39L, INHA, WDR6, PRR11, SIRT1, DUSP3, NUP214, H2AX, FBXO4, ATR, COPS5, ACTB, HCFC1, PRKACB, THOC1, LIN9, TRIM21, CRY1, JUN, BIRC2, NR4A1, E2F2, CCNDBP1, LIN54 |
|-------------------------------------------------------------------------------------------------------------------------------------------------------------------|

Upregulated genes:

|                                                                                                                                                                                                                                                                                                                                                                                                                                                                                                                                                                                                                                                                                                                                                                                                                                                                                                                                                                                                                                                                                                                                                                                                                                                                                                                                                                                                                                                                                                                                 |
|---------------------------------------------------------------------------------------------------------------------------------------------------------------------------------------------------------------------------------------------------------------------------------------------------------------------------------------------------------------------------------------------------------------------------------------------------------------------------------------------------------------------------------------------------------------------------------------------------------------------------------------------------------------------------------------------------------------------------------------------------------------------------------------------------------------------------------------------------------------------------------------------------------------------------------------------------------------------------------------------------------------------------------------------------------------------------------------------------------------------------------------------------------------------------------------------------------------------------------------------------------------------------------------------------------------------------------------------------------------------------------------------------------------------------------------------------------------------------------------------------------------------------------|
| <b>Cell projection organization</b>                                                                                                                                                                                                                                                                                                                                                                                                                                                                                                                                                                                                                                                                                                                                                                                                                                                                                                                                                                                                                                                                                                                                                                                                                                                                                                                                                                                                                                                                                             |
| LRP1, SRC, FLOT1, CNR1, DNM2, RAB11A, SNAPIN, SYT3, CDH1, RAB13, RAB10, CNTN1, PICALM, FZD4, MT3, TMEM108, MAPT, PTPRS, KIF1A, PLD1, CORO1C, SMO, EZR, SDC4, RAB17, NTRK1, ROR2, AREG, EPHA8, UNC5B, FOLR1, NFASC, RND2, CLMN, RHOQ, TCIRG1, EMP2, RAB34, RHOV, RCC2, ABCD2, CDC42, AKT1, MAPK8IP2, STX1B, NRXN1, CACNG7, SHANK1, PRKCI, HAP1, PPP3CA, SRCIN1, PACSIN1, ATP1B2, ROR1, TNIK, RTN4, CYFIP2, SYNGAP1, IQSEC1, DBN1, ZMYND8, MAP1A, KIF5A, SLC12A5, AGRN, CTNNA2, SPOCK1, CNTNAP1, WHRN, IGSF9, PALLD, SAMD14, SEMA3F, SEMA4B, PHACTR1, BCL11A, LAMA5, WASF3, NDE1, DMTN, PALM, ATP1A3, DYNLL2, PTPN11, AGT, RASGRF1, PAK1, VEGFA, PIK3R1, NDRG4, SPP1, RAB29, SCN1B, RUFY3, TRIM46, AMIGO1, ATP8A2, MICALL2, EFNA1, VANGL2, ROBO1, KIDINS220, HDAC2, GAB1, PIK3CA, SHC1, MACF1, CUX2, YTHDF1, PTK7, TNFRSF12A, NGEF, STMN3, NIBAN2, KREMEN1, CTSZ, TRAK1, L1CAM, CRMP1, KNDC1, RNF6, ATAT1, PTPRF, KIF5C, BBS4, ARL3, EPHA1, LHFPL5, FLRT1, DPYSL5, PDZD7, ATP8B1, USH1G, SEMA6C, SEMA6B, SEMA4G, LINGO1, ITGA6, PLK5, LRTM2, VASP, B4GALT6, LYPLA2, S100A6, PTPRM, ARTN, RPS6KA5, NYAP1, TBC1D23, VASH2, ALKBH1, F2RL1, RAB25, ARAP1, FAM110C, LGMN, NECTIN2, WTIP, PKHD1, VAV2, NME5, JHY, TUBB4A, ESPN, RREB1, AKIRIN1, RILPL1, RILPL2, CCDC39, ARFIP2, CROCC, SEPTIN9, DZIP1, TNPO1, WDR60, CAPZB, CDC42EP4, CDC42EP5, PARVB, PLEK2, INPPL1, CARMIL2, CCDC65, DNAI1, FHDC1, KCTD17, CNTROB, MTSS1, AK7, CDC14B, ABLIM1, CEP126, DNAI2, CCDC114, CEP41, CFAP70, BBOF1, UNC119B                                  |
| <b>Whole membrane</b>                                                                                                                                                                                                                                                                                                                                                                                                                                                                                                                                                                                                                                                                                                                                                                                                                                                                                                                                                                                                                                                                                                                                                                                                                                                                                                                                                                                                                                                                                                           |
| LRP1, SRC, FLOT1, CNR1, DNM2, RAB11A, SNAPIN, SYT3, CDH1, RAB13, RAB10, CNTN1, PICALM, FZD4, MT3, TMEM108, MAPT, PTPRS, KIF1A, PLD1, CORO1C, SMO, EZR, SDC4, RAB17, NTRK1, ROR2, AREG, EPHA8, UNC5B, FOLR1, NFASC, RND2, CLMN, RHOQ, TCIRG1, EMP2, RAB34, RHOV, RCC2, ABCD2, TH, GNAI2, SEPTIN4, HIP1, STX1A, SYT7, RAB3B, SYT12, ZDHHC2, ITPR1, WFS1, SYP, SV2A, RAB26, CLN3, CNIH2, ATAD1, LAMP1, CBARP, RAB12, SYNGR3, SEPTIN8, ATP2B1, KCNH1, CLSTN1, PRKAR1A, SNAP23, GAD1, SYNGR1, OTOF, GNB1, SLC12A4, VDAC1, SYPL1, STX7, ZNRF2, INPP4A, APPL2, MYO6, ACSL3, FZD7, PSAP, ADGRG1, FOXO3, SUN2, SPHK2, RAP1B, TNFRSF1A, PTPRJ, TRAF2, HYAL2, BID, SNX4, CEACAM1, ITGAV, KCNQ1, DMPK, RAB7A, STOM, RAB31, HYAL3, LDLRAP1, REEP6, SREBF2, SAR1B, C11orf65, SCARB1, STIM1, CD24, HPSE, SLC44A2, TFRC, RRAGD, BMF, HBEGF, TICAM1, LCK, LITAF, TSPAN14, RHOF, ADGRG3, NPRL2, DEPDC5, CBLC, ADGRE5, ENPEP, ECE2, ITGA2B, CAVIN1, CYB5R1, ORMDL3, ALDH3B1, MAGT1, STEAP3, MOSPD2, PRCP, STK10, RABEPK, PHACTR2, APLP2, MLEC, MANBA, CYSTM1, MYO1D, HSPA9, FAM210B, PLEKHB2, FNDCC5, AP1S3, SKAP1, VPS13A, WIP1, AP1G2, GGA2, KDELR3, BICD2, TSPAN15, RAB22A, RABEP1, RASSF9, VPS37B, VPS37D, RABGEF1, MARCHF5, VPS13C, TOMM20, ATG9B, SLC7A5, ACACB, STAT6, PLPP2, SLC3A2, AQP4, MREG, NECAP2, ABCD4, ACSL6, PEX11A, SLC26A11, SLC9A7, ATP6V0B, PRAF2, PARM1, MR1, PMEPA1, PLIN3, MARCHF9, CD164, APH1B, MFSD12, IZUMO1, TMEM184A, MARCHF2, AIFM2, LMBRD1, CCDC136, CYB561, MAP1LC3B, EXD2, SNN, BRI3BP, ARMCX6, ARMCX2, TMEM35A |
| <b>Synapse</b>                                                                                                                                                                                                                                                                                                                                                                                                                                                                                                                                                                                                                                                                                                                                                                                                                                                                                                                                                                                                                                                                                                                                                                                                                                                                                                                                                                                                                                                                                                                  |
| LRP1, SRC, FLOT1, CNR1, DNM2, RAB11A, SNAPIN, SYT3, CDH1, RAB13, RAB10, CNTN1, PICALM, FZD4, MT3, TMEM108, MAPT, PTPRS, KIF1A, PLD1, CORO1C, CDC42, AKT1, MAPK8IP2, STX1B, NRXN1, CACNG7, SHANK1, PRKCI, HAP1, PPP3CA, SRCIN1, PACSIN1, ATP1B2, ROR1, TNIK, RTN4, CYFIP2, SYNGAP1, IQSEC1, DBN1, ZMYND8, MAP1A, KIF5A, SLC12A5, AGRN, CTNNA2, SPOCK1, CNTNAP1, WHRN, IGSF9, PALLD, SAMD14, SEMA3F, SEMA4B, PHACTR1, BCL11A, LAMA5, WASF3, NDE1, DMTN, PALM, ATP1A3, DYNLL2, TH, GNAI2, SEPTIN4, HIP1, STX1A, SYT7, RAB3B, SYT12, ZDHHC2, ITPR1, WFS1, SYP, SV2A, RAB26, CLN3, CNIH2, ATAD1, LAMP1, CBARP, RAB12, SYNGR3, SEPTIN8, ATP2B1, KCNH1, CLSTN1, PRKAR1A, SNAP23, GAD1, SYNGR1, OTOF, GNB1, SLC12A4, VDAC1, SYPL1, STX7, ZNRF2, INPP4A, STAT3, NR1D1, CLU, ARHGEF2, ETV5, MDGA1, SDK2, ADORA1, MAPK14, FGA, ARRB2, SLC4A8, NLGN2, RIMS3, SHISA7, HOMER3, KCNC2, HRH3, CACNA1G, ACHE, ASIC1, DNM1, UNC119, MICAL1, LGI3, HPCA, KCNC1, KCND1, HCN3, CABP1, MKLN1, KCNJ4, GNB5, SLC8A2, PLEKHG5, RASD2, MAPK8IP1, PJA2, MADD, CTBP2, IGSF9B, MPP2, CRHR2, PSD2, SLC29A1, NAAA, PPPIA3, PDYN, APC2, IL1RAP, GRID2IP, PLCB3, KCNK3, ANXA9, SST, PLAT, LY6H, GJD2, MYCBPAP, CANX, OLFM2, SEPTIN3, GABBR1, CPEB1, FBXO2, RGS17, RPL38, RPL3, SLC29A4, LRFN1, SLC29A2, BCAN, PPFIBP1, TUFM, COL4A5, PLEKHA5, SYNC, FRRS1L                                                                                                                                                                                                       |
| <b>Neurogenesis</b>                                                                                                                                                                                                                                                                                                                                                                                                                                                                                                                                                                                                                                                                                                                                                                                                                                                                                                                                                                                                                                                                                                                                                                                                                                                                                                                                                                                                                                                                                                             |
| LRP1, SRC, FLOT1, CNR1, DNM2, RAB11A, SNAPIN, SYT3, CDH1, RAB13, RAB10, CNTN1, PICALM, FZD4, MT3, TMEM108, MAPT, PTPRS, KIF1A, SMO, EZR, SDC4, RAB17, NTRK1, ROR2, AREG, EPHA8, UNC5B, FOLR1, NFASC, RND2, CLMN, CDC42, AKT1, MAPK8IP2, STX1B, NRXN1, CACNG7, SHANK1, PRKCI, HAP1, PPP3CA, SRCIN1, PACSIN1, ATP1B2, ROR1, TNIK, RTN4, CYFIP2, SYNGAP1, IQSEC1, DBN1, ZMYND8, MAP1A, KIF5A, SLC12A5, AGRN, CTNNA2, SPOCK1, CNTNAP1, WHRN, IGSF9, PALLD, SAMD14, SEMA3F, SEMA4B, PHACTR1, BCL11A, LAMA5, WASF3, NDE1, PTPN11, AGT, RASGRF1, PAK1, VEGFA, PIK3R1, NDRG4, SPP1, RAB29, SCN1B, RUFY3, TRIM46, AMIGO1, ATP8A2, MICALL2, EFNA1, VANGL2, ROBO1, KIDINS220, HDAC2, GAB1, PIK3CA, SHC1, MACF1, CUX2, YTHDF1, PTK7, TNFRSF12A, NGEF, STMN3, NIBAN2, KREMEN1, CTSZ, TRAK1, L1CAM, CRMP1, KNDC1, RNF6, ATAT1, PTPRF, KIF5C, BBS4, ARL3, EPHA1, LHFPL5, FLRT1, DPYSL5, PDZD7, ATP8B1, USH1G, SEMA6C, SEMA6B, SEMA4G, LINGO1, ITGA6, PLK5, LRTM2, VASP, B4GALT6, LYPLA2, S100A6, PTPRM, ARTN, RPS6KA5, NYAP1, TBC1D23, VASH2, ALKBH1, TH, APPL2, MYO6, ACSL3, FZD7, PSAP, ADGRG1, FOXO3, SUN2, STAT3, NR1D1, CLU, ARHGEF2, ETV5, MDGA1, SDK2, TGFB1, GAS6, ERBB3, CHD7, CDON, CHD5, ZMIZ1, GDF11, YAP1, RORA, SLC44A4, RARA, SOCS2, GNAT1, AGBL4, PRDM1, KCTD11, DNMT3B, HMG20B, OTP, DTX1, ZFH3, HMG20A, ZFH2, CASZ1, PDE6C, NFE2L1, NRBP2, NGRN, LEMD2, SIRT2, DNER, TMEM98, SOX6, ZNF609, PLAG1, SCRT1, IGSF10, GPR157, ASTN1, CHAC1, TEAD3                                                                                 |

**Regulation of transport**

LRP1, SRC, FLOT1, CNR1, DNM2, RAB11A, SNAPIN, SYT3, CDH1, RAB13, RAB10, CNTN1, PICALM, PLD1, SMO, EZR, SDC4, RAB17, RHOQ, TCIRG1, CDC42, AKT1, MAPK8IP2, STX1B, NRXN1, CACNG7, SHANK1, PRKCI, HAP1, PPP3CA, SRCIN1, PACSIN1, ATP1B2, DMTN, PTPN11, AGT, RASGRF1, PAK1, VEGFA, PIK3R1, NDRG4, SPP1, RAB29, SCN1B, RUFY3, TRIM46, AMIGO1, ATP8A2, MICALL2, F2RL1, RAB25, GNAI2, SEPTIN4, HIP1, STX1A, SYT7, RAB3B, SYT12, ZDHHC2, ITPR1, WFS1, SYP, SV2A, RAB26, CLN3, CNIH2, ATAD1, LAMP1, CBARP, RAB12, SYNGR3, SEPTIN8, ATP2B1, KCNH1, APPL2, MYO6, ACSL3, SPHK2, RAP1B, TNFRSF1A, PTPRJ, TRAF2, HYAL2, BID, SNX4, CEACAM1, ITGAV, KCNQ1, DMPK, RAB7A, STOM, RAB31, HYAL3, LDLRAP1, REEP6, SREBF2, SAR1B, C11orf65, SCARB1, STIM1, STAT3, NR1D1, CLU, ADORA1, MAPK14, FGA, ARRB2, SLC4A8, NLGN2, RIMS3, SHISA7, HOMER3, KCNC2, HRH3, CACNA1G, ACHE, ASIC1, DNM1, UNC119, MICAL1, LGI3, HPCA, KCNC1, KCND1, HCN3, CABP1, MKLN1, KCNJ4, GNB5, TGFB1, GAS6, ERBB3, CHD7, TCF7L2, TNFRSF11A, PYCARD, SIRT3, PDX1, CD40, CD81, FKBP1A, ARHGEF5, PEA15, TRPM4, CHGA, HFE, GPR27, PFKFB2, TM7SF3, RNF207, KCNN4, CHCHD10, JPH4, JPH3, OPRL1, TMBIM6, CD22, JSRP1, LRP5, SIRT4, HADH, CACNA2D2, KDM5B, SLC8B1, ABCC8, ACVR1C, HMGN3, G6PC2, FAM3D, PNKD, HCN2, KCNJ5, FGF11, LLGL2, RHBDL1, CACNA1F, AZIN2, TESC, PKDCC, KMT2A, TMEM30B, CRACR2B, RIPOR1, OAZ2, NPEPPS, SIAH3, SLC38A3, KCNQ4, KCNH2, KCNA7, KCNF1, KCNH4, KCNAB3, KCNH3, HSPA2, PACSIN3, CACNA2D4, ANO9, CD151, ANKRD13B, ARPP19, RBM27
